# Supplementary material
Source: publisher figshare collection journal article supplement (https://frontiersin.figshare.com/ndownloader/files/34455995)
Supplement: Supplementary file [file 34455995]

# **Ethnic Specificity of Species and Strain Composition of *Lactobacillus* Populations from Mother-infant Pairs, Uncovered by Multilocus Sequence Typing**

***Lixia Yuan<sup>1</sup>, Xuelin Zhang<sup>1</sup>, Baolong Luo<sup>1</sup>, Xu Li<sup>1</sup>, Fengwei Tian<sup>2</sup>, Wenli Yan<sup>1\*</sup> and Yongqing Ni<sup>1\*</sup>***

*<sup>1</sup>School of Food Science and Technology, Shihezi University, Fourth Nouth Ave., Shihezi 832000, Xinjiang, People's Republic of China, <sup>2</sup>School of Food Science and Technology, Jiangnan University, Wuxi, China*

**\*Corresponding authors**

Email addresses: Y. N.: niyqlzu@sina.com; W.Y.: wenliyan62@sina.com

Tell: Y.N.:15299950600; W.Y.:13095096273

Contents

**Supplementary Figures..... 3**

Fig. S1 Fingerprint typing cluster of 64 representative strains of *L. paracasei* based on Box-air and (GTG)<sub>5</sub> primers..... 3

Fig. S2 The phylogenetic tree of 64 representative *L. paracasei* strains based on the concatenated sequence of the seven housekeeping genes. The maximum likelihood method was used for the analysis with 1,000 bootstrap repeats. .... 4

**Supplementary Tables.....5**

Table. S1 The characteristics and demographic data of the mothers and infants in this study..... 5

Table. S2 The survey overview of main diet of mothers and infants of two ethnic groups during breastfeeding in this study.....5

Supplementary Figure

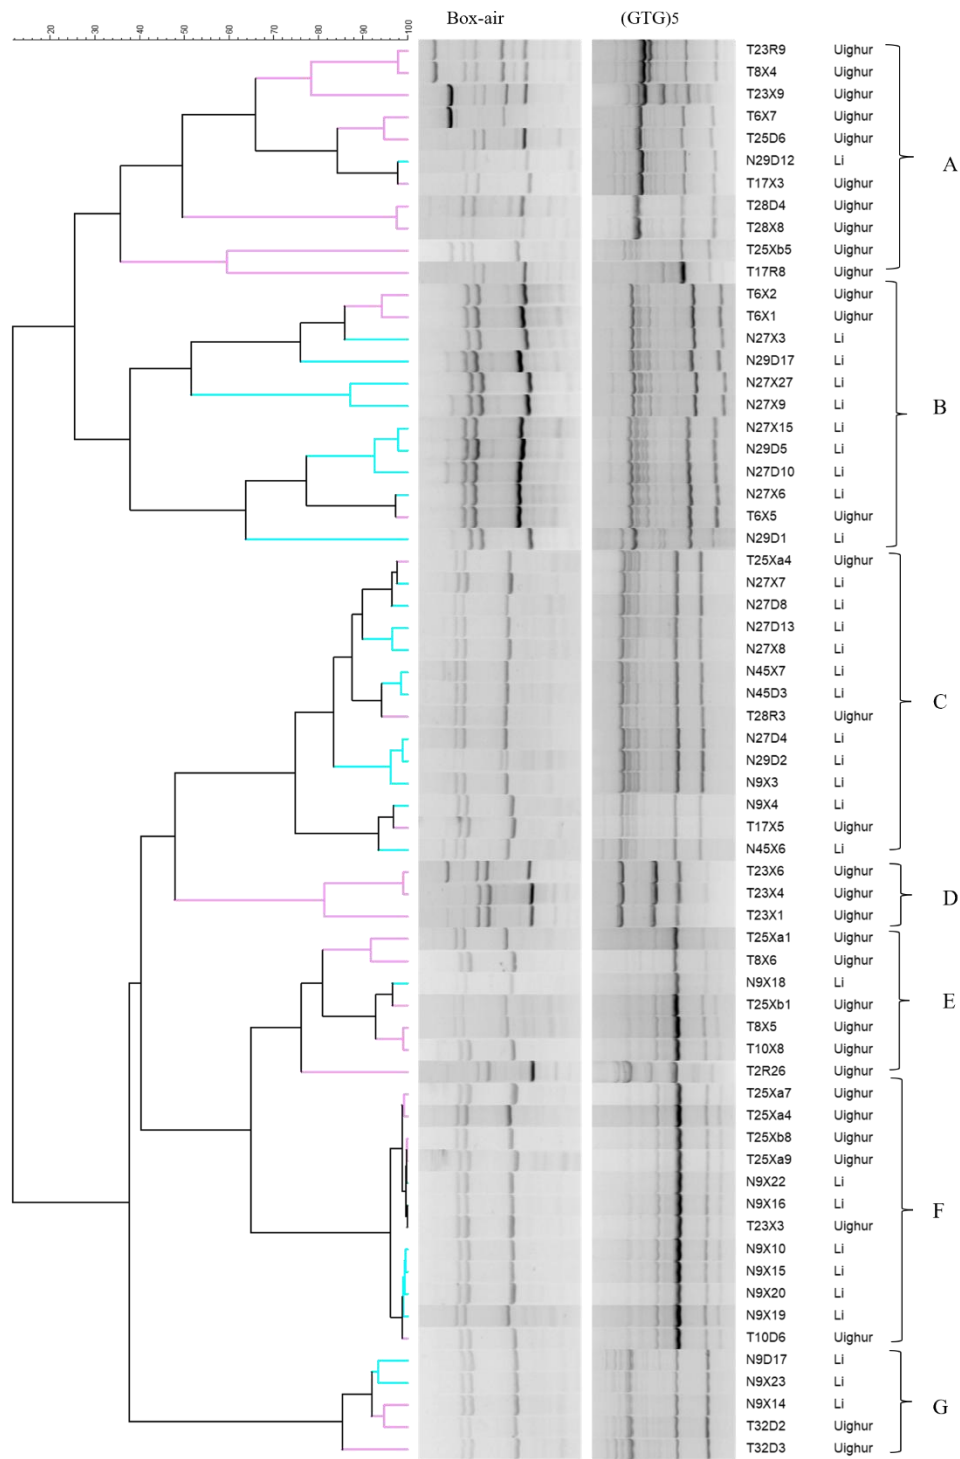

**FIG. S1** Fingerprint typing cluster of 64 representative strains of *L. paracasei* based on Box-air and (GTG)5 primers.

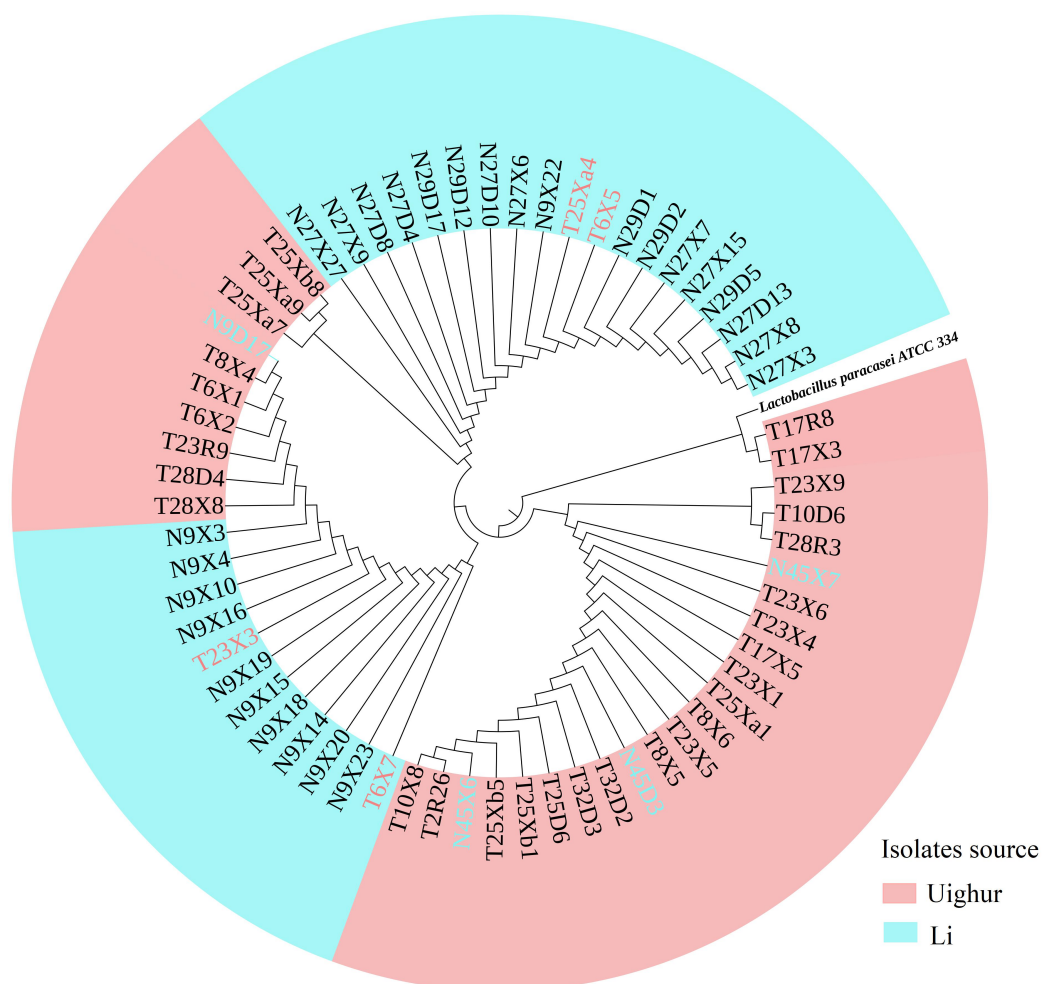

**FIG. S2** The phylogenetic tree of 64 representative *L. paracasei* strains based on the concatenated sequence of the seven housekeeping genes. The maximum likelihood method was used for the analysis with 1,000 bootstrap repeats.

## Supplementary Tables

**Supplementary Table S1.** The characteristics and demographic data of the mothers and infants in this study.

| Characteristics and demographic data | Values (%)   |              |
|--------------------------------------|--------------|--------------|
|                                      | Uighur       | Li           |
| <b>Infant sex</b>                    |              |              |
| Male                                 | 8 (47)       | 7 (50)       |
| Female                               | 9 (53)       | 7 (50)       |
| <b>Feeding way</b>                   |              |              |
| Breastfeeding                        | 0            | 1 (7)        |
| breastfeeding + formula feeding      | 1 (6)        | 2 (15)       |
| breastfeeding + liquid feeding       | 16 (94)      | 8 (57)       |
| formula feeding + liquid feeding     | 0            | 3 (21)       |
| infant weight (kg)                   | 7.27 ± 0.07* | 7.29 ± 0.57* |
| infant length (cm)                   | 66           | 71           |
| <b>Maternal BMI condition</b>        |              |              |
| Normal (18.5-23.9)                   | 8            | 10           |
| Slightly fat (24.0-26.9)             | 1            | 3            |
| Obesity (27-29.9)                    | 7            | 1            |
| Unknown                              | 1            | 0            |

\*, Mean ± SD

**Supplementary Table S2.** The survey overview of main diet of mothers and infants of two ethnic groups during breastfeeding in this study

| Ethnic groups |                | Main diet                                                                                                                                                                                                                                              |
|---------------|----------------|--------------------------------------------------------------------------------------------------------------------------------------------------------------------------------------------------------------------------------------------------------|
| Li            | <b>Monther</b> | Breakfast: rice porridge, papaya porridge, powder soup (seafood) , occasionally pickles<br>Lunch: congee, sour melon fried meat, pickled cabbage, fish, snail, occasionally chicken and duck<br>Dinner: porridge<br>side dish: coconut , mango, papaya |
|               | <b>Infant</b>  | Feeding way: breast milk or milk powder                                                                                                                                                                                                                |
| Uighur        | <b>Monther</b> | Breakfast: milk tea, soy milk, milk, naan bread<br>Lunch: noodles, lamb and rice, beef, onion<br>Dinner: soup, rice noodles<br>side dish: dried fruit, rose sauce, cheese                                                                              |
|               | <b>Infant</b>  | feedingway: Breast milk , milk powder, feed a liquid diet occasionally                                                                                                                                                                                 |
